# Supplementary material
Source: HighWire-hosted journal article supplement (https://www.cmajopen.ca/highwire/filestream/80919/field_highwire_adjunct_files/5/open-2016-0024-strobe-checklist.pdf)
Supplement: open-2016-0024-strobe-checklist.pdf [file open-2016-0024-strobe-checklist.pdf]

## Checklist of recommendations for reporting of observational studies using the STROBE guidelines

|                              | Item No | Recommendation                                                                                                                                                                                      | Reported                                   |
|------------------------------|---------|-----------------------------------------------------------------------------------------------------------------------------------------------------------------------------------------------------|--------------------------------------------|
| Title and abstract           | 1       | (a) Indicate the study's design with a commonly used term in the title or the abstract                                                                                                              | Abstract                                   |
|                              |         | (b) Provide in the abstract an informative and balanced summary of what was done and what was found                                                                                                 | Abstract                                   |
| <b>Introduction</b>          |         |                                                                                                                                                                                                     |                                            |
| Background/rationale         | 2       | Explain the scientific background and rationale for the investigation being reported                                                                                                                | Introduction                               |
| Objectives                   | 3       | State specific objectives, including any pre-specified hypotheses                                                                                                                                   | Introduction                               |
| <b>Methods</b>               |         |                                                                                                                                                                                                     |                                            |
| Study design                 | 4       | Present key elements of study design early in the paper                                                                                                                                             | Methods                                    |
| Setting                      | 5       | Describe the setting, locations, and relevant dates, including periods of recruitment, exposure, follow-up, and data collection                                                                     | Methods                                    |
| Participants                 | 6       | (a) Give the eligibility criteria, and the sources and methods of selection of participants. Describe methods of follow-up                                                                          | Methods                                    |
|                              |         | (b) For matched studies, give matching criteria and number of exposed and unexposed                                                                                                                 | Not Applicable                             |
| Variables                    | 7       | Clearly define all outcomes, exposures, predictors, potential confounders, and effect modifiers. Give diagnostic criteria, if applicable                                                            | Methods                                    |
| Data sources/<br>measurement | 8       | For each variable of interest, give sources of data and details of methods of assessment (measurement). Describe comparability of assessment methods if there is more than one group                | Methods                                    |
| Bias                         | 9       | Describe any efforts to address potential sources of bias                                                                                                                                           | Discussion                                 |
| Study size                   | 10      | Explain how the study size was arrived at                                                                                                                                                           | Methods, based on availability of the data |
| Quantitative variables       | 11      | Explain how quantitative variables were handled in the analyses. If applicable, describe which groupings were chosen and why                                                                        | Methods                                    |
| Statistical methods          | 12      | (a) Describe all statistical methods, including those used to control for confounding                                                                                                               | Methods                                    |
|                              |         | (b) Describe any methods used to examine subgroups and interactions                                                                                                                                 | Methods                                    |
|                              |         | (c) Explain how missing data were addressed                                                                                                                                                         | Not Applicable                             |
|                              |         | (d) If applicable, explain how loss to follow-up was addressed                                                                                                                                      | Not Applicable                             |
|                              |         | (e) Describe any sensitivity analyses                                                                                                                                                               | Not Applicable                             |
| <b>Results</b>               |         |                                                                                                                                                                                                     |                                            |
| Participants                 | 13      | (a) Report numbers of individuals at each stage of study—e.g. numbers potentially eligible, examined for eligibility, confirmed eligible, included in the study, completing follow-up, and analysed | Methods, Results, Figure S1                |
|                              |         | (b) Give reasons for non-participation at each stage                                                                                                                                                | Methods, Results, Figure S1                |
|                              |         | (c) Consider use of a flow diagram                                                                                                                                                                  | Figure S1                                  |

|                          |    |                                                                                                                                                                                                               |                       |
|--------------------------|----|---------------------------------------------------------------------------------------------------------------------------------------------------------------------------------------------------------------|-----------------------|
| Descriptive data         | 14 | (a) Give characteristics of study participants (e.g. demographic, clinical, social) and information on exposures and potential confounders                                                                    | Table 1               |
|                          |    | (b) Indicate number of participants with missing data for each variable of interest                                                                                                                           | Essentially Complete  |
|                          |    | (c) Summarise follow-up time (e.g. average and total amount)                                                                                                                                                  | Not applicable        |
| Outcome data             | 15 | Report numbers of outcome events or summary measures over time                                                                                                                                                | Results, Table 2,3,4  |
| Main results             | 16 | (a) Give unadjusted estimates and, if applicable, confounder-adjusted estimates and their precision (e.g. 95% confidence interval). Make clear which confounders were adjusted for and why they were included | Results, Table 2,3,4, |
|                          |    | (b) Report category boundaries when continuous variables were categorized                                                                                                                                     | Table 2,3,4           |
|                          |    | (c) If relevant, consider translating estimates of relative risk into absolute risk for a meaningful time period                                                                                              | Not applicable        |
| Other analyses           | 17 | Report other analyses done—e.g. analyses of subgroups and interactions, and sensitivity analyses                                                                                                              | Table 3, Table S1     |
| <b>Discussion</b>        |    |                                                                                                                                                                                                               |                       |
| Key results              | 18 | Summarise key results with reference to study objectives                                                                                                                                                      | Discussion            |
| Limitations              | 19 | Discuss limitations of the study, taking into account sources of potential bias or imprecision. Discuss both direction and magnitude of any potential bias                                                    | Discussion            |
| Interpretation           | 20 | Give a cautious overall interpretation of results considering objectives, limitations, multiplicity of analyses, results from similar studies, and other relevant evidence                                    | Discussion            |
| Generalisability         | 21 | Discuss the generalisability (external validity) of the study results                                                                                                                                         | Discussion            |
| <b>Other information</b> |    |                                                                                                                                                                                                               |                       |
| Funding                  | 22 | Give the source of funding and the role of the funders for the present study and, if applicable, for the original study on which the present article is based                                                 | Cover page            |
